# Supplementary material for: Cytoplasmic viscosity is a potential biomarker for metastatic breast cancer cells
Source: Royal Society of Chemistry journal article supplement (doi:10.1039/d4na00003j), 2024-01-01
Supplement: d4na00003j1.xlsx [file d4na00003j1.xlsx]

## Sheet: MCF-10A
Exp. conditions	Movie#n - Wire#m	Length (¬µm)	Diameter (¬µm)	OmegaC (rad/s)-JFB	delta OmegaC (rad/s)	L*(L/D)-JFB	delta L*(L/D)	MCF-10A viscosity (Pa s)	Delta viscosity (Pa s)		ThetaB (w/wC=1) rad	ThetaB (w/wC=1000) rad	MCF-10A Elastic modulus G (Pa)	Delta (Eastic modulus) (Pa)
Run 16-Mar-22	Slide1 - Field1 - Wire1	2	0.7	0.9425	0.1885	3.343	0.40588	6.9592	3.0819
Device3 - Slide1	Slide1 - Field1 - Wire2	3	0.6	0.03204	0.01194	4.673	0.54519	104.72	63.449		1.022	0.085	78.959	22.372
S1=2.50 V	Slide1 - Field1 - Wire3	3.9	0.75	0.02011	0.004021	4.794	0.44253	158.58	60.993		0.99	0.03	212.57	49.871
S2=2.22 V	Slide1 - Field1 - Wire4	5	0.7	0.009425	0.001885	5.947	0.54371	219.86	84.176		1.51	0.2	20.722	4.8252
	Slide1 - Field1 - Wire5	2.2	0.6	0.9425	0.1885	3.853	0.49626	5.2366	2.3961
	Slide1 - Field2 - Wire1	3.6	0.7	0.09425	0.01885	4.759	0.47217	34.324	13.675		1.29	0.073	88.628	22.016
	Slide1 - Field2 - Wire2	4.2	0.75	0.09425	0.01885	5.035	0.45551	30.675	11.686
	Slide1 - Field3 - Wire1	3.5	1	0.09425	0.01885	3.749	0.29468	55.318	19.76		1.7	0.16	65.17	13.503
	Slide1 - Field3 - Wire2	2.9	0.7	0.09425	0.01885	4.149	0.43941	45.172	18.603		1.37	0.28	30.409	7.9619
	Slide1 - Field3 - Wire4	4.1	0.85	0.02011	0.004021	4.566	0.37994	174.83	64.062
	Slide1 - Field4 - Wire1	2.1	0.85	0.2011	0.04021	3.094	0.32928	38.084	15.725		1.19	0.105	145.85	38.343
	Slide1 - Field4 - Wire2	2	0.55	0.09425	0.01885	3.834	0.5403	52.884	25.48		1.13	0.25	39.873	13.231
	Slide1 - Field4 - Wire5	4.9	0.9	0.3204	0.1194	4.941	0.37536	9.3661	4.9123
	Slide1 - Field4 - Wire6	2.9	0.7	0.09425	0.01885	4.149	0.43941	45.172	18.603		1.06	0.067	127.08	33.274
	Slide1 - Field5 - Wire1	4.4	0.75	0.01477	0.005341	5.194	0.46431	183.96	99.43		1	0.104	52.236	11.951
	Slide1 - Field5 - Wire2	2.4	0.75	0.4398	0.08796	3.56	0.3857	13.144	5.4767
	Slide1 - Field5 - Wire3	6.7	0.95	0.01477	0.005341	5.894	0.39819	142.86	70.974		1.39	0.14	30.134	5.5782
	Slide1 - Field6 - Wire2	2.3	0.75	0.2011	0.04021	3.476	0.38286	30.166	12.678		1.37	0.24	50.543	13.661
	Slide1 - Field7 - Wire1	3.2	0.9	0.9425	0.1885	3.784	0.32846	5.4305	2.0289
	Slide1 - Field8 - Wire1	2	0.6	0.9425	0.1885	3.644	0.48592	5.8541	2.7319
	Slide1 - Field8 - Wire2	5.1	0.75	0.01477	0.005341	5.746	0.49574	150.31	80.304		0.96	0.18	24.66	5.4881
	Slide1 - Field8 - Wire3	3.1	0.7	0.09425	0.01885	4.325	0.4484	41.574	16.936
	Slide1 - Field8 - Wire6	2.6	0.65	0.09425	0.01885	4.061	0.46852	47.158	20.314		1.28	0.26	34.189	9.5991
	Slide1 - Field8 - Wire7	2.7	0.85	0.03204	0.01194	3.545	0.33987	181.92	102.65
	Slide1 - Field8 - Wire10	3	0.6	0.1477	0.05341	4.673	0.54519	22.727	13.523
	Slide1 - Field8 - Wire11	1.6	0.6	0.9425	0.1885	3.22	0.46964	7.4971	3.6861
	Slide1 - Field8 - Wire12	1.8	0.6	0.4398	0.08796	3.434	0.47689	14.132	6.7521
Run 17-Mar-22	Slide1 - Field1 - Wire1	3.5	0.85	0.09425	0.01885	4.133	0.36123	45.512	17.058		1.17	0.107	80.176	18.023
Device3 - Slide1	Slide1 - Field1 - Wire2	4.9	1	0.006912	0.002513	4.612	0.32475	498.39	251.41		1.29	0.07	98.418	18.78
S1=2.50 V
S2=2.22 V	Slide1 - Field2 - Wire1	4.2	0.95	0.06912	0.02513	4.32	0.33023	56.813	29.345		1.08	0.046	170.72	34.637
	Slide1 - Field2 - Wire2	3.2	0.95	0.09425	0.01885	3.666	0.30755	57.838	21.271		1.22	0.08	136.28	29.676
	Slide1 - Field2 - Wire3	2.3	0.6	0.2011	0.04021	3.957	0.50181	23.276	10.558		1.38	0.17	55.057	16.716
	Slide1 - Field2 - Wire4	2.5	0.6	0.2011	0.04021	4.164	0.5135	21.025	9.3912
	Slide1 - Field2 - Wire5	3.3	0.85	0.9425	0.1885	3.988	0.3554	4.8899	1.8496
	Slide1 - Field2 - Wire6	4	0.75	0.02011	0.004021	4.874	0.44682	153.39	58.801
	Slide1 - Field2 - Wire7	3.3	0.85	0.06912	0.02513	3.988	0.3554	66.68	36.133		1.06	0.1	92.172	21.039
	Slide1 - Field2 - Wire9	4.3	0.8	0.006912	0.002513	4.9	0.42028	441.68	236.38		0.7	0.056	109.02	24.155
	Slide1 - Field2 - Wire10	2.5	0.65	0.04398	0.008796	3.965	0.46361	105.98	45.977		1.06	0.08	116.53	33.075
	Slide1 - Field3 - Wire1	1.4	0.75	0.9425	0.1885	2.689	0.37133	10.753	5.1207
	Slide1 - Field3 - Wire2	1.7	0.95	4.398	0.8796	2.634	0.2936	2.401	1.0154
	Slide1 - Field4 - Wire1	4.6	0.85	0.09425	0.01885	4.922	0.3965	32.099	11.592		1.2	0.076	79.613	16.808
	Slide1 - Field4 - Wire3	4.4	0.8	0.02011	0.004021	4.975	0.42398	147.28	54.559		1.03	0.17	34.837	7.68
	Slide1 - Field4 - Wire4	4.3	0.75	0.1477	0.05341	5.114	0.4599	18.973	10.275
	Slide1 - Field4 - Wire6	2.6	0.75	0.06912	0.02513	3.728	0.39194	76.281	43.777
	Slide1 - Field5 - Wire1	2.6	1	0.6912	0.2513	3.177	0.28108	10.502	5.6769
	Slide1 - Field6 - Wire1	1.9	0.75	0.9425	0.1885	3.134	0.37391	7.9148	3.4714
	Slide1 - Field6 - Wire2	2.6	0.9	0.03204	0.01194	3.363	0.31616	202.22	113.36		0.6	0.2	64.8	15.425
	Slide1 - Field6 - Wire3	2.3	0.9	0.03204	0.01194	3.149	0.31182	230.66	131.62
	Slide1 - Field6 - Wire4	3.3	0.5	0.03204	0.01194	5.629	0.73342	72.185	45.704		1.04	0.12	38.552	11.974
2022-04-01	Slide1 - Field2 - Wire2	3.1	0.85	0.1477	0.05341	3.841	0.34985	33.638	18.295		1	0.095	104.57	24.276
Device3	Slide1 - Field2 - Wire4	6.4	0.9	0.06912	0.02513	5.928	0.42198	30.169	15.265		1.1	0.045	92.672	17.827
S1=2.50 V
S2=2.22 V	Slide1 - Field3 - Wire1	3.8	1.05	0.06912	0.02513	3.824	0.2827	72.523	37.096		1.21	0.102	98.283	19.447
	Slide1 - Field3 - Wire2	2.6	0.55	0.09425	0.01885	4.507	0.58311	38.273	17.557		1.29	0.19	37.97	11.723
	Slide1 - Field3 - Wire3	1.8	0.65	0.6912	0.2513	3.286	0.43536	9.8175	6.1712
	Slide1 - Field3 - Wire5	3.4	1.1	0.1477	0.05341	3.491	0.26138	40.716	20.824
	Slide1 - Field3 - Wire7	4.4	0.85	0.1477	0.05341	4.78	0.3898	21.723	11.4		1.42	0.1	64.15	13.67
	Slide1 - Field4 - Wire1	3.1	0.9	0.1477	0.05341	3.714	0.32616	35.975	19.33
	Slide1 - Field5 - Wire1	3.6	0.6	0.3204	0.06283	5.273	0.58594	8.2233	3.4398		0.81	0.048	109.8	29.889
	Slide1 - Field5 - Wire2	4.8	0.95	0.2011	0.04021	4.705	0.34565	16.465	5.7121		0.66	0.052	127.32	25.074
	Slide1 - Field5 - Wire4	4.4	0.9	0.09425	0.01885	4.606	0.36054	36.656	13.07		1.2	0.15	46.063	9.515
	Slide1 - Field5 - Wire5	1.5	0.6	0.5655	0.377	3.113	0.4669	13.375	12.929
	Slide1 - Field5 - Wire7	1.7	0.6	0.2827	0.1571	3.327	0.473	23.41	19.661		1.21	0.15	88.253	29.504
	Slide1 - Field6 - Wire1	3.6	0.95	0.09425	0.01885	3.93	0.316	50.346	18.166		1.1	0.16	59.313	12.504
	Slide1 - Field6 - Wire2	3.6	0.95	0.6912	0.2513	3.93	0.316	6.8654	3.6006
	Slide1 - Field6 - Wire4	1.9	0.5	0.1477	0.05341	3.936	0.60082	32.029	21.362
	Slide1 - Field7 - Wire2	2.7	0.95	0.9425	0.1885	3.333	0.29886	6.9994	2.6551
	Slide1 - Field7 - Wire3	1.5	0.5	2.011	0.4021	3.434	0.57226	3.0914	1.6488
	Slide1 - Field7 - Wire4	2.5	1.1	0.1477	0.05341	2.964	0.25328	56.494	30.09

## Sheet: MCF-7
Exp. conditions	Movie#n - Wire#m	Length (¬µm)	Diameter (¬µm)	OmegaC (rad/s)-JFB	delta OmegaC (rad/s)	L*(L/D)-JFB	delta L*(L/D)	MCF-10A viscosity (Pa s)	Delta viscosity (Pa s)		ThetaB (w/wC=1) rad	ThetaB (w/wC=1000) rad	MCF-10A Elastic modulus G (Pa)	Delta (Eastic modulus) (Pa)
Run 08-Feb-22	Field#1 - Wire#1	2.6	0.65	0.02011	0.002011	4.061	0.46852	221.05	73.117
MCF7	Field#1 - Wire#3	2.5	0.65	0.3204	0.1194	3.965	0.46361	14.546	8.8204
Device 3	Field#1 - Wire#4	4.1	0.6	0.02011	0.002011	5.766	0.6211	109.64	34.585
S1 = 2.66 V
S2= 2.33 V	Field#2 - Wire#1	2.5	0.65	0.1477	0.05341	3.965	0.46361	31.567	18.8
	Field#2 - Wire#2	3.75	0.75	0.01477	0.005341	4.673	0.43615	227.27	124.63
	Field#4 - Wire#1	2	0.7	0.6912	0.2513	3.343	0.40588	9.4898	5.7555
	Field#4 - Wire#4	4.6	1	0.06912	0.02513	4.43	0.31777	54.037	27.403		1.3	0.22	33.952	6.569
	Field#4 - Wire#5	2	0.45	0.06912	0.02513	4.334	0.69831	56.437	38.708		1.13	0.16	48.758	18.149
	Field#4 - Wire#7	1.3	0.55	0.9425	0.1257	3.024	0.39118	8.5043	3.3343
	Field#5 - Wire#1	2.5	0.85	0.06912	0.02513	3.396	0.33562	91.926	51.596		1.51	0.22	57.759	14.304
	Field#5 - Wire#4	1.8	0.5	0.3204	0.1194	3.812	0.59293	15.74	10.761
	Field#6 - Wire#2	5.5	1	0.06912	0.02513	4.975	0.58791	42.844	25.706
	Field#6 - Wire#4	2.6	0.8	0.02011	0.006283	3.592	0.36264	282.49	145.32
	Field#6 - Wire#5	2.6	0.55	0.02011	0.006283	4.507	0.58311	179.4	102.48
Run 15-Feb-22	Field#1 - Wire#2	3.8	0.8	0.01477	0.005341	4.521	0.40154	242.8	130.95		1.09	0.24	29.876	6.8006
MCF7	Field#1 - Wire#3	2.6	0.7	0.01477	0.005341	3.883	0.4267	329.16	191.4		1.2	0.18	54.002	14.569
Device 3
S1 = 2.5 V	Field#2 - Wire#1	3.6	0.75	0.01477	0.005341	4.552	0.42987	239.56	131.9		1.54	0.31	22.821	5.4517
S2= 2.22 V	Field#2 - Wire#3	3.8	0.55	0.06912	0.02513	5.81	0.68109	31.409	18.785
	Field#2 - Wire#4	5.6	1.1	0.03204	0.01194	4.728	0.29934	102.3	51.064		1.27	0.21	31.22	5.5141
	Field#2 - Wire#5	4.7	0.85	0.01477	0.005341	4.992	0.39988	199.13	103.93
	Field#2 - Wire#6	4	0.95	0.2011	0.03142	4.191	0.32532	20.755	6.4653
	Field#3 - Wire#1	3	0.6	0.03204	0.01194	4.673	0.54519	104.72	63.449		1.11	0.27	24.857	7.0429
	Field#3 - Wire#2	4.2	0.9	0.03204	0.01194	4.47	0.35478	114.44	60.798
	Field#3 - Wire#3	4.1	0.9	0.03204	0.01194	4.402	0.35195	117.99	62.824		1.39	0.31	24.394	5.12
	Field#4 - Wire#2	8	1.15	0.01477	0.005341	5.838	0.32679	145.62	68.976		1.13	0.2	21.502	3.4824
	Field#4 - Wire#3	3.4	1.1	0.2011	0.03142	3.491	0.26138	29.901	9.1491
	Field#4 - Wire#4	4	0.85	0.03204	0.01194	4.494	0.37672	113.22	61.162		1.01	0.082	88.49	19.26
	Field#5 - Wire#1	7.1	1.05	0.006912	0.002513	5.724	0.35318	323.63	157.62		1.17	0.15	29.824	5.1717
	Field#5 - Wire#2	5.3	0.8	0.03204	0.01194	5.643	0.45918	71.809	38.438		1.4	0.25	18.408	3.9161
	Field#5 - Wire#3 (see note in KeyNote Report)	2.6	0.8	0.06912	0.02513	3.592	0.36264	82.18	46.478
	Field#5 - Wire#4	5.5	0.9	0.06912	0.02513	5.339	0.39372	37.189	19.008
	Field#6 - Wire#1	3.1	1.1	0.1477	0.05341	3.318	0.25782	45.09	23.317		1.29	0.42	31.703	6.5127
	Field#6 - Wire#2	9.8	0.9	0.006912	0.002513	8.078	0.53123	162.47	80.448
	Field#6 - Wire#3	5	1	0.06912	0.02513	4.673	0.32711	48.553	24.453		1.06	0.06	111.86	21.253
	Field#6 - Wire#5	3	0.8	0.1477	0.05341	3.905	0.37425	32.542	18.007
	Field#7 - Wire#1	4.4	0.5	0.03204	0.01194	6.902	0.84712	47.999	29.663		0.62	0.064	48.065	14.201
	Field#7 - Wire#2	3	0.6	0.09425	0.01885	4.673	0.54519	35.606	15.429
	Field#7 - Wire#5	5.1	0.75	0.06912	0.02513	5.746	0.49574	32.112	17.218
	Field#7 - Wire#6	5.4	0.7	0.009425	0.001885	6.279	0.56477	197.22	74.922		1.32	0.14	26.553	6.1045
	Field#7 - Wire#7	6.7	0.8	0.009425	0.001885	6.659	0.51561	175.32	62.213		1.09	0.14	23.605	4.8356
Run 22-Feb-22	Slide1 - Field1 - Wire1	3.2	0.8	0.3204	0.1194	4.061	0.38067	13.87	7.7679		0.89	0.045	197.53	46.914
MCF7	Slide1 - Field1 - Wire2	2.9	0.65	0.1477	0.05341	4.345	0.48404	26.29	15.367		1.09	0.15	51.758	14.12
Device 3	Slide1 - Field1 - Wire3	3.8	0.8	0.03204	0.01194	4.521	0.40154	111.88	61.554		0.87	0.097	73.919	16.826
S1 = 2.5 V
S2= 2.22 V	Slide1 - Field2 - Wire1	5.7	0.85	0.06912	0.02513	5.691	0.43459	32.739	16.905		1.08	0.18	25.142	5.0971
	Slide1 - Field3 - Wire1	6.6	0.9	0.02011	0.00377	6.058	0.42833	99.317	32.667		0.9	0.15	26.625	5.0965
	Slide1 - Field3 - Wire2	4.6	0.9	0.04398	0.008796	4.74	0.3664	74.147	26.292		1.5	0.16	40.765	8.34
	Slide1 - Field4 - Wire1	4.7	0.8	0.009425	0.001885	5.199	0.43555	287.66	105.73		1.33	0.12	45.185	9.8302
	Slide1 - Field4 - Wire2	5.7	0.85	0.02011	0.00377	5.691	0.43459	112.54	38.29		1.37	0.13	34.811	7.0575
	Slide1 - Field5 - Wire1	3.9	0.65	0.04398	0.008796	5.273	0.54087	59.913	24.272		1.31	0.16	32.939	8.4036
	Slide1 - Field5 - Wire2	6.1	0.9	0.009425	0.001885	5.733	0.41249	236.56	81.352		1.17	0.15	29.727	5.764
	Slide1 - Field5 - Wire3	5.6	0.85	0.1477	0.05341	5.622	0.43107	15.704	8.0887
	Slide1 - Field5 - Wire4	1.7	0.75	0.9425	0.1885	2.96	0.37144	8.8748	4.0023
Run 22-Feb-22	Slide2 - Field1 - Wire1	4	0.85	0.09425	0.01885	4.494	0.37672	38.495	14.153		1.08	0.096	75.585	16.451
MCF7	Slide2 - Field1 - Wire2	2.6	0.8	0.9425	0.1885	3.592	0.36264	6.0265	2.4222
Device 3	Slide2 - Field1 - Wire4	3.4	0.75	0.2011	0.0377	4.389	0.42167	18.922	7.1838		1.64	0.33	23.057	5.5835
S1 = 2.5 V	Slide2 - Field1 - Wire6	2.2	0.65	0.09425	0.01885	3.677	0.61706	57.518	30.811
S2= 2.22 V	Slide2 - Field1 - Wire9	2.9	0.85	0.04398	0.01257	3.694	0.34465	122.12	57.68		1.64	0.31	34.652	8.199
	Slide2 - Field2 - Wire1	4.8	1	0.06912	0.02513	4.552	0.3224	51.179	25.861		1.33	0.14	50.532	9.6854
	Slide2 - Field3 - Wire1	4.3	0.85	0.02011	0.00377	4.709	0.38648	164.38	57.807		1.13	0.24	27.543	5.8985
	Slide2 - Field3 - Wire7	2.3	0.8	0.9425	0.1885	3.354	0.35545	6.9119	2.8474

## Sheet: MDA-MB-231
Exp. conditions	Movie#n - Wire#m	Length (¬µm)	Diameter (¬µm)	OmegaC (rad/s)-JFB	delta OmegaC (rad/s)	L*(L/D)-JFB	delta L*(L/D)	MCF-10A viscosity (Pa s)	Delta viscosity (Pa s)		ThetaB (w/wC=1) rad	ThetaB (w/wC=1000) rad	MCF-10A Elastic modulus G (Pa)	Delta (Eastic modulus) (Pa)
MDA-MB	Slide1 - Field1 - Wire1	4.9	0.9	0.03204	0.01194	4.941	0.40364	93.661	50.195		1.42	0.096	62.527	13.342
2022-03-01
Device3	Slide1 - Field3 - Wire1	4.3	0.8	0.04398	0.008796	4.9	0.30163	69.407	22.427		1.35	0.15	40.702	7.0466
S1=2.50 V	Slide1 - Field3 - Wire2	3.6	1	0.1477	0.05341	3.812	0.085191	34.159	13.882
S2=2.22 V
	Slide1 - Field4 - Wire1	3.7	0.8	0.4398	0.08796	4.445	0.053879	8.4332	1.8911		1.44	0.14	52.988	3.934
	Slide1 - Field5 - Wire1	5.3	0.75	0.06912	0.02513	5.902	0.23445	30.435	13.485		1.47	0.21	20.033	2.5932
	Slide1 - Field5 - Wire2	8.5	0.8	0.009425	0.001885	7.931	1.9252	123.6	84.727
	Slide1 - Field5 - Wire3	3.7	0.8	0.04398	0.008796	4.445	0.27543	84.332	27.318
	Slide2 - Field1 - Wire1	3.9	0.7	0.06912	0.02513	5.017	0.21001	42.115	18.84		1.46	0.14	41.583	5.5601
	Slide2 - Field3 - Wire1	2.7	0.7	0.9425	0.1885	3.972	0.044934	4.9285	1.0972		1.33	0.29	32.035	2.3265
	Slide2 - Field3 - Wire3	3	0.75	0.4398	0.08796	4.061	0.054411	10.105	2.2919
MDA-MB	Slide1 - Field1 - Wire2	3.7	0.85	0.03204	0.01194	4.278	0.35105	124.94	67.053
2022-03-08	Slide1 - Field1 - Wire3	3.2	0.8	0.9425	0.1885	4.061	0.040622	4.7158	1.0375
Device3	Slide1 - Field1 - Wire6	2	0.9	0.6912	0.2513	2.93	0.037072	12.346	4.8019
S1=2.50 V	Slide1 - Field1 - Wire7	8.8	1	0.09425	0.01885	6.902	0.19093	16.32	4.1668
S2=2.22 V
	Slide1 - Field2 - Wire1	3	0.65	0.3204	0.1194	4.439	0.069772	11.606	4.6885
	Slide1 - Field2 - Wire2	2.6	0.6	0.9425	0.1885	4.266	0.05063	4.2721	0.95583
	Slide1 - Field2 - Wire3	2.7	0.6	2.011	0.4021	4.368	0.04458	1.9099	0.42096
	Slide1 - Field2 - Wire4	2.8	0.6	0.2011	0.04021	4.47	0.093123	18.238	4.4075
	Slide1 - Field3 - Wire1	2.9	0.9	2.011	0.4021	3.574	0.032065	2.8527	0.62173
	Slide1 - Field4 - Wire1	1.4	0.55	4.398	0.8796	3.142	0.048369	1.6876	0.38947
	Slide1 - Field4 - Wire2	3	0.75	0.9425	0.1885	4.061	0.042644	4.7158	1.0422
	Slide1 - Field4 - Wire2	1.6	0.7	4.398	0.8796	2.972	0.0383	1.8857	0.42573
	Slide2 - Field3 - Wire1	3.3	0.9	0.9425	0.1885	3.853	0.037046	5.2366	1.148
	Slide2 - Field4 - Wire1	3.9	0.95	0.9425	0.1885	4.126	0.035895	4.5681	0.99312
	Slide2 - Field4 - Wire2	4.2	0.75	0.04398	0.008796	5.035	0.31075	65.732	21.261
MDA-MB	Slide1 - Field1 - Wire1	2.2	1	0.4398	0.08796	2.916	0.038822	19.598	4.4415		1.49	0.13	132.61	10.162
2022-03-10	Slide1 - Field1 - Wire2	3.4	0.65	0.9425	0.3142	4.813	0.047279	3.357	1.185
Device3	Slide1 - Field1 - Wire4	2.6	0.65	0.9425	0.3142	4.061	0.04762	4.7158	1.6825		1.3	0.24	37.038	2.7206
S1=2.50 V
S2=2.22 V	Slide1 - Field2 - Wire1	5.5	0.9	0.4398	0.08796	5.339	0.053599	5.844	1.2861		1.22	0.04	128.52	9.006
	Slide1 - Field2 - Wire2	7.7	1.05	0.02011	0.004021	6.058	0.74789	99.317	44.387
	Slide1 - Field3 - Wire1	2.3	0.8	1.885	0.6283	3.354	0.035845	3.456	1.2259
	Slide1 - Field3 - Wire1	7	1.1	0.09425	0.03142	5.489	0.16181	25.806	10.123
	Slide1 - Field4 - Wire1	3.6	0.8	0.4398	0.08796	4.368	0.053604	8.731	1.9605
	Slide1 - Field4 - Wire2	2.5	0.7	2.011	0.6032	3.794	0.039856	2.5322	0.81288
	Slide1 - Field5 - Wire1	3.6	0.7	0.4398	0.08796	4.759	0.058979	7.355	1.6533		1.66	0.31	20.87	1.5608
	Slide1 - Field5 - Wire2	3.6	0.9	0.9425	0.1885	4.061	0.037253	4.7158	1.0297
MDA-MB	Slide1 - Field1 - Wire1	3.1	0.7	0.4398	0.08796	4.325	0.05767	8.9087	2.0193		1.47	0.15	52.243	4.0055
2022-03-15	Slide1 - Field2 - Wire1	3.5	0.75	0.044		4.47	0.27882	83.342			1.47	0.19	38.6	6.7451
Device3	Slide1 - Field3 - Wire4	4.1	0.8	0.01477	0.005341	4.749	0.81725	220.08	155.36
S1=2.50 V	Slide1 - Field4 - Wire1	2.8	0.7	0.0942		4.061	0.13767	47.182			1.93	0.27	32.922	3.8786
S2=2.22 V	Slide1 - Field4 - Wire2	3.4	0.75	0.09425	0.01885	4.389	0.14459	40.367	10.733		1.25	0.15	50.726	5.8787
	Slide1 - Field4 - Wire4	3.2	0.6	0.09425	0.01885	4.874	0.16443	32.724	8.7526
	Slide2 - Field1 - Wire1	3	0.9	0.3204	0.1194	3.644	0.053993	17.218	6.9247		1.69	0.35	31.528	2.5106
	Slide2 - Field2 - Wire2	2.3	0.8	0.2011	0.04021	3.354	0.068492	32.4	7.8032
	Slide2 - Field2 - Wire3	3.1	0.6	0.1477	0.05341	4.774	0.11711	21.777	8.9452		1.08	0.26	24.734	2.4503
	Slide2 - Field5 - Wire2	4.4	1.4	0.032		3.524	0.26661	184.38			1.47	0.33	35.759	7.1982
	Slide2 - Field6 - Wire1	3.5	0.7	0.03204	0.01194	4.673	0.38998	104.72	56.493		1.25	0.096	69.911	15.164
MDA-MB	Slide1 - Field1 - Wire1	3.3	0.75	0.4398	0.08796	4.307	0.055353	8.9813	2.0271		1.31	0.12	65.837	4.984
2022-03-30
Device3	Slide1 - Field2 - Wire2	4.4	1	0.9425	0.1885	4.307	0.034792	4.1913	0.90597
S1=2.50 V	Slide1 - Field3 - Wire2	3.2	1	0.0942	15	3.56	0.111	61.37	9776.1		1.72	0.26	44.47	4.9964
S2=2.22 V	Slide1 - Field4 - Wire1	4	1.1	0.03204	0.01194	3.834	0.30315	155.54	82.541
	Slide1 - Field4 - Wire3	6.1	0.85	0.02011	0.004021	5.966	0.74328	102.38	45.986
	Slide1 - Field5 - Wire1	3.2	0.65	0.2011	0.04021	4.626	0.091707	17.029	4.0808		1.75	0.23	29.772	2.6689
	Slide1 - Field6 - Wire1	2	0.8	2.011	0.4021	3.113	0.035463	3.7618	0.83808
	Slide1 - Field7 - Wire1	2.4	1	9.425	1.885	3.047	0.0265	0.8372	0.182
	Slide1 - Field8 - Wire1	1.7	0.8	9.425	1.885	2.866	0.032929	0.94681	0.21112
	Slide1 - Field9 - Wire1	5.7	0.8	0.09425	0.01885	5.936	0.17812	22.063	5.7367
MDA-MB	Slide1 - Field1 - Wire1
2022-03-31	Slide1 - Field1 - Wire2	5.7	1	0.9425	0.1885	5.094	0.035245	2.9958	0.64061		1.13	0.052	108.6	6.9323
Device3
S1=2.50 V	Slide1 - Field2 - Wire1	5.6	0.85	0.2011	0.04021	5.622	0.092837	11.533	2.6875		1.51	0.17	27.28	2.265
S2=2.22 V
	Slide1 - Field4 - Wire1	3.8	1	0.4398	0.08796	3.936	0.045712	10.753	2.4003		1.33	0.09	105.09	7.6956
	Slide1 - Field5 - Wire1	2.5	0.7	0.4398	0.08796	3.794	0.055597	11.576	2.6545		1.26	0.13	78.329	6.2122
	Slide1 - Field6 - Wire1	5.6	0.8	0.06912	0.02513	5.863	0.23168	30.841	13.652		1.13	0.12	35.526	4.5838
	Slide1 - Field7 - Wire1	4.4	0.75	0.03204	0.01194	5.194	0.42712	84.767	45.521		1.44	0.19	28.593	6.1322
	Slide1 - Field7 - Wire2	5.6	1.05	0.09425	0.01885	4.874	0.1484	32.724	8.5374		1.4	0.2	30.842	3.42
	Slide1 - Field8 - Wire1	1.7	0.6	9.425	1.885	3.327	0.043423	0.7023	0.15879
	Slide1 - Field8 - Wire2	1.9	0.75	12.57	6.283	3.134	0.034904	0.59361	0.31003
	Slide1 - Field8 - Wire3	7.1	0.9	0.2011	0.04021	6.38	0.097583	8.9545	2.0648		1.34	0.094	38.307	3.0872
	Slide1 - Field9 - Wire1	3.4	0.65	0.2011	0.04021	4.813	0.0935	15.736	3.7587
